# 1     **Cross-neutralization antibodies against SARS-CoV-2 and RBD mutations from** 2     **convalescent patient antibody libraries**

3     Yan Lou<sup>1,#</sup>, Wenxiang Zhao<sup>2,3,#</sup>, Haitao Wei<sup>3</sup>, Min Chu<sup>3</sup>, Ruihua Chao<sup>2,3</sup>, Hangping  
4     Yao<sup>1</sup>, Junwei Su<sup>1</sup>, Yanan Li<sup>3</sup>, Xiulan Li<sup>3</sup>, Yu Cao<sup>3</sup>, Yanyan Feng<sup>3</sup>, Ping Wang<sup>3</sup>,  
5     Yongyang Xia<sup>3</sup>, Yushuan Shang<sup>3</sup>, Fengping Li<sup>3</sup>, Pingju Ge<sup>4</sup>, Xinglin Zhang<sup>4</sup>, Wenjing  
6     Gao<sup>4</sup>, Bing Du<sup>2,\*</sup>, Tingbo Liang<sup>1,\*</sup>, Yunqing Qiu<sup>1,\*</sup>, Mingyao Liu<sup>2,\*</sup>

7     <sup>1</sup>State Key Laboratory for diagnosis and treatment of infectious diseases, Key  
8     Laboratory for Drug Evaluation and Clinical Research of Zhejiang Province, The First  
9     Affiliated Hospital, Zhejiang University School of Medicine, Hangzhou 310003, China

10    <sup>2</sup> Shanghai Key Laboratory of Regulatory Biology, Institute of Biomedical Sciences  
11    and School of Life Sciences, East China Normal University, Shanghai 200241, China

12    <sup>3</sup> SymRay Biopharma Inc., Shanghai 200241, China

13    <sup>4</sup> Acrobiosystems Inc., Beijing 100176, China

15    <sup>#</sup>**These authors contributed equally to this work.**

17    **\*Corresponding author:**

18    **Mingyao Liu**, Ph.D., Institute of Biomedical Sciences and School of Life Sciences, East  
19    China Normal University, 500 Dongchuan Road, Shanghai 200241, China; Tel:  
20    +86-21-54344030; Fax: +86-21-54344922; E-mail: [myliu@bio.ecnu.edu.cn](mailto:myliu@bio.ecnu.edu.cn)

21    **Yunqing Qiu**, M.D., State Key Laboratory for diagnosis and treatment of infectious  
22    diseases, Key Laboratory for Drug Evaluation and Clinical Research of Zhejiang Province,  
23    The First Affiliated Hospital, Zhejiang University School of Medicine, 79 Qingchun Road,  
24    Hangzhou 310003, China, Tel: +86-571-87236626. Fax: +86-571-87236626. E-mail:  
25    [qiuyq@zju.edu.cn](mailto:qiuyq@zju.edu.cn)

26    **Tingbo Liang**, M.D., The First Affiliated Hospital, Zhejiang University School of Medicine,  
27    79 Qingchun Road, Hangzhou 310003, China, Tel: +86-571-87236688. Fax:  
28    +86-571-87236626. E-mail: [liangtingbo@zju.edu.cn](mailto:liangtingbo@zju.edu.cn)

29    **Bing Du**, Ph.D., Institute of Biomedical Sciences and School of Life Sciences, East China  
30    Normal University, 500 Dongchuan Road, Shanghai 200241, China; Tel:  
31    +86-21-24206964; Fax: +86-21-54344922; E-mail: [bdu@bio.ecnu.edu.cn](mailto:bdu@bio.ecnu.edu.cn)

## 32     **Abstract**

33     The emergence of coronavirus disease 2019 (COVID-19) pandemic led to an urgent  
34     need to develop therapeutic interventions. Among them, neutralizing antibodies play  
35     crucial roles for preventing viral infections and contribute to resolution of infection.  
36     Here, we describe the generation of antibody libraries from 17 different COVID-19  
37     recovered patients and screening of neutralizing antibodies to SARS-CoV-2. After 3  
38     rounds of panning, 456 positive phage clones were obtained with high affinity to RBD  
39     (receptor binding domain). Then the positive clones were sequenced and  
40     reconstituted into whole human IgG for epitope binning assays. After that, all 19 IgG  
41     were classified into 6 different epitope groups or Bins. Although all these antibodies  
42     were shown to have ability to bind RBD, the antibodies in Bin2 have more superiority  
43     to inhibit the interaction between spike protein and angiotensin converting enzyme 2  
44     receptor (ACE2). Most importantly, the antibodies from Bin2 can also strongly bind  
45     with mutant RBDs (W463R, R408I, N354D, V367F and N354D/D364Y) derived from  
46     SARS-CoV-2 strain with increased infectivity, suggesting the great potential of these  
47     antibodies in preventing infection of SARS-CoV-2 and its mutations. Furthermore,  
48     these neutralizing antibodies strongly restrict the binding of RBD to hACE2  
49     overexpressed 293T cells. Consistently, these antibodies effectively neutralized  
50     pseudovirus entry into hACE2 overexpressed 293T cells. In Vero-E6 cells, these  
51     antibodies can even block the entry of live SARS-CoV-2 into cells at only 12.5 nM.  
52     These results suggest that these neutralizing human antibodies from the  
53     patient-derived antibody libraries have the potential to become therapeutic agents

54 against SARS-CoV-2 and its mutants in this global pandemic.

55 **Keywords:** SARS-CoV-2, RBD mutations, ACE2, Neutralizing antibody, IgG

56

## 57 Introduction

58 A newly emerged pathogen spreading worldwide named severe acute respiratory  
59 syndrome coronavirus 2 (SARS-CoV-2) is now causing a pandemic and is  
60 responsible for more than 5,300,000 cases and 340,000 death. This global pandemic  
61 threatens public health greatly than ever before. SARS-CoV-2 belongs to  
62 *Sarbecovirus* subgenus and shares substantial genetic and functional similarity with  
63 other pathogenic human betacoronaviruses, including Severe Acute Respiratory  
64 Syndrome Coronavirus (SARS-CoV) and Middle East Respiratory Syndrome  
65 Coronavirus (MERS-CoV) <sup>1, 2</sup>. Whereas, the unique pathogenesis and rapid  
66 international transmission of SARS-CoV-2 make it become the most infectious and  
67 destructive coronavirus than SARS-CoV and MERS-CoV <sup>3-5</sup>. So, the prophylactic  
68 vaccines or therapeutic drugs that are effective and specific to SARS-CoV-2 and its  
69 mutants are urgent need to stop the pandemic.

70 Like other coronaviruses, SARS-CoV-2 utilizes its envelope spike (S) glycoprotein for  
71 interaction with a cellular receptor for entry into the target cell. Angiotensin converting  
72 enzyme 2 (ACE2) has been identified as the main receptor for viral entry through  
73 triggering a cascade of cell membrane fusion events <sup>6</sup>. The spike glycoprotein is  
74 composed of two functional subunits responsible for binding to the host cell receptor  
75 (S1 subunit) and fusion of the viral and cellular membranes (S2 subunit). And the host  
76 range and cellular tropism of SARS-CoV-2 are determined by the receptor-binding  
77 domain (RBD) within the S1 subunit <sup>7</sup>. Although the entry of SARS-CoV-2 into  
78 susceptible cells is a complex process and need to be further explored, the

79 receptor-binding and proteolytic processing of the S protein are regarded as the key  
80 events in promoting virus-cell fusion. Whereas, more and more RBD mutants have  
81 been found under high positive selection pressure during the spread. The fact that  
82 these mutations increased the SARS-CoV-2 binding affinity to its host receptor ACE2  
83 reveals a higher risk of more severe infections during a sustained pandemic of  
84 COVID-19<sup>8</sup>. Thus, common neutralization of interaction between ACE2 and RBD with  
85 different mutations could serve as promising candidates for prophylactic and  
86 therapeutic interventions against SARS-CoV-2 infection<sup>9</sup>.

87 During the last epidemic, SARS patients benefits a lot from convalescent serum  
88 collected from recovered subjects<sup>10</sup>. Meanwhile, the blood from COVID-19 patients  
89 who have recently become virus-free displayed serum neutralizing activities in a  
90 pseudotype entry assay<sup>11</sup>. However, the source of convalescent serum and risk of  
91 blood transfusion limited the clinical application. And the heterotransplantation of  
92 animal serum may cause anaphylactic reactions such as human anti-mouse  
93 antibodies (HAMA) response<sup>12</sup>. Thus, it would be ideal to develop human antibodies  
94 against SARS-CoV-2 for prophylaxis or treatment<sup>13</sup>. Different approaches can be  
95 developed to get full human antibodies. Among them, phage display library facilitates  
96 the identification and development of specific affinity antibodies in a rapid and  
97 cost-effective manner. Several full human antibodies against the S1 domain have  
98 been generated and all of these antibodies can neutralize the virus *in vitro* and *in vivo*  
99<sup>14</sup>. In order to develop potent neutralizing human antibodies against SARS-CoV-2,  
100 single chain antibody fragment (scFv)-phage libraries were constructed by the B cells

101 from 18 different COVID-19 recovered patients. Then several neutralizing human  
102 antibodies were identified and characterized with the ability to bind with different RBD  
103 and its mutants (R408I, W463R, N354D, V367F and N354D/D364Y) and block the  
104 interaction with hACE2. Finally, these antibodies dramatically inhibited SARS-CoV-2  
105 RBD mediated entry into cells using both pseudovirus and live SARS-CoV-2 virus,  
106 indicating that patient-derived phage display antibody libraries could be an attractive  
107 source of neutralizing antibodies to SARS-CoV-2 and these antibodies are specific  
108 prophylactic and therapeutic agents against ongoing SARS-CoV-2 pandemic.

109

## 110 **Results**

### 111 **Generation of Patient-derived antibody library**

112 As the source of therapeutic antibodies to COVID-19, the anti-SARS-CoV-2 B cells  
113 were enriched obviously in COVID-19 convalescent patients. Thus, the PBMC from  
114 18 different COVID-19 recovered patients were isolated to generate phage displayed  
115 scFv libraries for panning the neutralizing antibodies (Figure 1A). Prior to construct  
116 the phage display library, we examined the binding ability of plasma from 18  
117 recovered COVID-19 patients to SARS-CoV-2 RBD. We found that most of these  
118 convalescent patients were able to produce high titer of SARS-CoV-2 RBD-specific  
119 antibodies and only three patients mounted relatively lower anti-RBD IgG responses  
120 when compared with health donor by enzyme-linked immunosorbent assay (ELISA)  
121 (Fig. 1B). Then, the phage display libraries from 17 patients were constructed  
122 respectively and quality assessment of each library was undertaken by RT-PCR clone

counting and phage display ELISA. The correlation between the size of an antibody library and the likelihood of selecting for the desired antibodies is somewhat intuitive. As shown in Figure 1C, the capacity of primary library from each patient is between  $1.01 \times 10^7$  to  $1.43 \times 10^8$  which is consistent with other immunized scFv library<sup>15</sup>. And the total capacity of whole library is more than  $10^9$ . Ideally, the size of a library should be equal to its effective size, meaning that all the  $10^9$  antibody variants comprising the library are displayed as functional scFv molecules on the phage surface. Whereas, the quality of gene amplification by RT-PCR affects the effective size of the libraries. So, we appraised the positive rate and scFv frequency of each library by PCR and phage display ELISA. Sequence analysis revealed that the framework region (FR) and complementarity determining region (CDR) of selected clones showed the greatest difference in amino acid sequences and the mean positive rate is 95.83% and 88.38% (Figure 1D&E). Taken together, our data revealed that the scFv library from COVID-19 recovered patients were constructed successfully.

137

### 138 **Panning against SARS-CoV-2 RBD**

Affinity selection of the patient-derived antibody library was performed using solid-phase-bound RBD. After three rounds of panning, 1728 phage clones were randomly picked out to induce the expression of soluble scFv for binding assay by ELISA. As shown in Figure 2A, there are 456 positive clones were identified to bind with RBD specifically. Then, 19 scFv clones with highest affinity to RBD were reconstituted into whole human IgG for functional assay. In order to characterize and



group these IgG by the epitope binding regions generated against RBD, the “epitope binning” assay was performed on Octet systems. As shown in Figure 2B, 19 IgG can be divided into 6 different Bins. Among them, Bin1 and Bin2 are biggest groups with 14 and 16 clones suggested that these two epitopes on RBD are most important for recognizing by humoral immune system. So, engineering antibody that targets a specific functioning epitope on an RBD is more important than finding high-affinity, tight-binding mAb, because affinity maturation is a mature and cost-effective technique.

153

#### 154 ***In vitro* binding assay to RBD**

To further confirm the binding affinity of each IgG in Bin1 and Bin2, the RBD was bound in 96-well plates to do IgG binding assay. Consistent with scFv binding assay (data not shown) , the IgG in both Bin1 and Bin2 have similar binding affinity to RBD (Figure 3A&B). As the main step for SARS-CoV-2 entry to the host cells, the interaction between spike and ACE2 is crucial to the viral infection. And the blocking of this interaction by neutralizing antibody have great potential in treating COVID-19. Thus, we sought to investigate whether these IgG can block the binding of RBD to hACE2 overexpressed 293T cells by FACS inhibition assay. As shown in Figure 3C&D, all the IgG in Bin1 and Bin2 have the ability to block the binding of RBD to hACE2 overexpressed 293T cells. Whereas, some IgG in Bin2 group have superior effective blockade of RBD binding to hACE2 cells, suggesting that the epitope of Bin2 is more critical to the infection of SARS-CoV-2 to the host cells. To further confirm this

167 hypothesis, the top 4 IgG in Bin2 were picked out for further study. Although the  
168 SARS-CoV-2 is similar to SARS, the amino acid sequence of RBD of SARS-CoV-2 is  
169 only about 74% homologous to that of SARS-CoV. So, we used the IgG specific to  
170 SARS (CR3022) as a control to do the functional assay. We demonstrated that all the  
171 IgG including HTS0422, HTS0433, HTS0446, HTS0483 and CR3022 bind to RBD  
172 specifically (Figure 3E). Whereas, only the four IgG (HTS0422, HTS0433, HTS0446  
173 and HTS0483) from Bin2 could inhibit the interaction between RBD and hACE2  
174 (Figure 3F), suggesting that the binding epitope of these IgG is crucial to the  
175 SARS-CoV-2 infection.

176

#### 177 **Cross-neutralization against SARS-CoV-2 RBD mutations**

178 As an RNA virus, mutations in SARS-CoV-2 is commonly found in different countries.  
179 Previous studies demonstrated that the mutations in RBD enhanced the binding  
180 affinity to the host cells. Therefore, cross-neutralization against SARS-CoV-2 RBD  
181 mutations is essential to develop an effective therapeutic antibody. In this study, five  
182 different SARS-CoV-2 RBD mutants (R408I, W463R, N354D, V367F and  
183 N354D/D364Y) from different strains found in India, Wuhan, Hong Kong, and  
184 Shenzhen, respectively, were obtained from ACRO BIOSYSTEMS. As shown in  
185 Figure 4A, HTS0422, HTS0433 and HTS0446 bind with both wildtype and mutant  
186 (W463R, N354D, V367F, both N354D and D364Y) RBD significantly. Whereas, only  
187 HTS0483 bind with R408I, a mutant strain from India, suggesting that R408 is  
188 essential for the binding of HTS0422, HTS0433 and HTS0446, and mutations at R408

abolished the binding of antibodies to the virus RBD. And HTS0483 may have broader cross-neutralization effect against SARS-CoV-2 RBD mutations. Accordingly, only HTS0483 inhibit the binding between ACE2 and all RBD mutants including W436R and R408I. Whereas, the antibodies (HTS0422, HTS0433 and HTS0446) can restrict the interaction between ACE2 and wildtype, N354D, V367F or N354D/D364Y (Figure 4B), implying that the mutations at W436R and R408I in RBD may cause immune ignorance by humoral immune response in convalescent patients.

196

### 197 **Antiviral properties of human antibodies**

To explore the potential of these top four IgG as therapeutic drugs, we tested whether these IgG can block the binding of RBD to hACE2 expressed cells by flow cytometry analysis. We found that these top four IgG from Bin2 could restrict the binding of RBD to hACE2-293T cells but not CR3022 which bind to both SARS and SARS-CoV-2 RBD (Figure 5A). Furthermore, we determined the neutralization ability of these four IgG (HTS0422, HTS0433, HTS0446 and HTS0483) using a SARS-CoV-2 S pseudotyped lentiviral particle. Consistent with ELISA and FACS-based blockade result, all these 4 antibodies effectively neutralized pseudovirus entry to host cells ectopically expressing hACE2, with EC50 from 12.80 nM to 16.54nM (Figure 5B&C). Furthermore, SARS-CoV-2 strain hCoV-19/Hangzhou/ZJU-05/2020 was obtained to do the live virus neutralization assay. As shown in Figure 5D, these four IgG from Bin2 inhibit the infection of SARS-CoV-2 significantly at 12.5nM. Finally, authentic infection of Vero-E6 cells with SARS-CoV-2 was neutralized with these IgG antibodies with

211 IC50 from 12.5 nM to 50 nM (Figure 5E), suggesting that these neutralizing antibodies  
212 can effectively inhibit infection of the virus to host cells by targeting to the epitope on  
213 RBD, and these antibodies are potential therapeutic agents for the treatment of  
214 COVID-19.

215

## 216 **Discussion**

217 Although different approaches have been performed to develop the therapeutic  
218 antibodies for infectious diseases, phage display library still persist as the common  
219 method for generation of recombinant antibodies against various targets for  
220 biomedical applications and research <sup>16</sup>. Till to now, up to 9 fully human therapeutic  
221 antibodies discovered via phage display were approved by the Food and Drug  
222 Administration (FDA) <sup>17</sup>. In this study, we constructed different phage displayed  
223 human scFv libraries from 17 different COVID-19 recovered patients to get the  
224 neutralizing antibodies to SARS-CoV-2 infection. Four human antibodies with similar  
225 binding epitope were identified to have the potential as a therapeutic antibody for  
226 treating COVID-19. Among them, the clone HTS0483 may have broader  
227 cross-neutralization against not only wildtype SARS-CoV-2 RBD but also four other  
228 mutations.

229 Similar with other coronaviruses, SARS-CoV-2 use the homotrimeric spike  
230 glycoprotein (comprising a S1 subunit and S2 subunit in each spike monomer) on the  
231 envelope to bind to their cellular receptors ACE2. Previous study demonstrated that  
232 the binding of SARS-CoV and SARS-CoV-2 spike glycoproteins with ACE2 induces

233 the dissociation of the S1 with ACE2, prompting the S2 to transit from a metastable  
234 pre-fusion to a more-stable post-fusion state that is essential for membrane fusion<sup>7, 18,</sup>  
235 <sup>19</sup>. Furthermore, *in vitro* measurements indicate that the RBD is a key functional  
236 component within the S1 subunit and is responsible for binding of SARS-CoV-2 by  
237 ACE2<sup>20</sup>. Although computer modelling of the interaction between the SARS-CoV-2  
238 RBD and ACE2 has identified some residues that are potentially involved in the  
239 interaction, the actual residues involved in the interaction remained unclear. Thus, we  
240 cloned the receptor binding domain in S1 subunit of SARS-CoV-2 spike glycoproteins  
241 as a target for panning neutralizing antibodies from patient-derived antibody libraries.  
242 Although more than 400 positive clones were identified to bind with RBD by ELISA  
243 assay, only part of them could block the interaction between RBD and ACE2  
244 significantly, suggesting that not all epitopes in the RBD involved in binding with ACE2.  
245 So, we sorted panel of selected antibodies according to epitope specificities by  
246 epitope binning assay. The more antibodies that are analyzed for cross-blocking in a  
247 pairwise and combinatorial manner against their specific antigen, the higher the  
248 probability of discriminating their epitopes. There are 6 different bins were identified,  
249 but most antibodies were divided into Bin1 and Bin2. Then we measured the binding  
250 affinity and blocking ability of each antibody in Bin1 and Bin2. We demonstrated that  
251 the antibodies in Bin1 and Bin2 have similar binding affinity to RBD. However, the  
252 neutralizing or blocking ability of antibodies in Bin2 is much better than in Bin1,  
253 suggesting that the epitope of Bin2 is essential for ACE2 binding. Therefore, if we can  
254 make some point mutation in RBD to explore the binding motif of antibodies in Bin2,

255 the actual residues that mediate the interaction between RBD and ACE2 will be  
256 discovered.

257 Till to now, 32 RBD mutant strains were identified in the strains all around the world  
258 and some of them have been proven to increase the infectivity. In addition, the S  
259 protein is also important for antigen cognition. Thus, the variation of S protein may  
260 change the antigen of virus and influence the vaccine immune efficiency. Therefore,  
261 the neutralization antibodies against more SARS-CoV-2 RBD mutations will have  
262 better potential in clinical application. In this study, although 4 antibodies are all from  
263 Bin2, the binding motif is identical to each other. For example, only HTS0483 binds  
264 with R408I mutant in RBD, suggesting that the binding of HTS0483 to RBD is  
265 independent of R481. Furthermore, only HTS0483 can block the binding of both  
266 W436R and R408I mutants to ACE2 implied that the mutation in RBD may cause the  
267 escape of SARS-COV-2 from humoral immune responses. Interestingly, the mutation  
268 W436R and R408I are isolated from Wuhan and India respectively. Whereas, the  
269 recovered patients are all from Zhejiang province without the mutation in RBD.  
270 Therefore, the convalescent patients or vaccine immunized people without the  
271 antibody like HTS0483 may still have chance to be infected by the SARS-COV-2 with  
272 W436R and R408I mutation. This could be the big challenge to develop effective  
273 vaccine against to COVID-19.

274 Some evidences have shown that the convalescent serum from a patient with a  
275 SARS-CoV infection and horse anti-SARS-CoV serum could cross-neutralize the  
276 infection of SARS-CoV-2, implied that the structure of RBDs in SARS-CoV-2 and

277 SARS-CoV are similar <sup>2, 6</sup>. Whereas, most antibodies targeted to SARS-CoV have  
 278 little cross-binding and neutralization activity against spike protein or RBD of  
 279 SARS-CoV-2, except SARS-CoV antibody CR3022 which binds to the SARS-CoV-2  
 280 RBD with a KD of 6.2 nM <sup>21, 22</sup>. In this study, we demonstrated that the binding affinity  
 281 of CR3022 is lower than 4 antibodies from Bin2. Furthermore, the neutralization  
 282 activity of CR3022 against RBD of SARS-CoV-2 to ACE2 is vanished when compared  
 283 with our antibodies, implying that the binding motif of SARS-CoV maybe different from  
 284 SARS-CoV-2. In addition, the pseudovirus entry and authentic virus infection of  
 285 Vero-E6 are both inhibited significantly by these antibodies.

286 In summary, the patient-derived antibody libraries provide another approach for  
 287 developing therapeutic antibodies against COVID-19 pandemic and the neutralizing  
 288 monoclonal antibodies will not only have the potential in clinical application but also  
 289 benefit the mechanism in exploring of SARS-CoV-2 entry to host cells.

290

291

## 292 **Materials and Methods**

### 293 **Anti-RBD antibody measurement**

294 18 plasma samples from COVID-19 patients and 3 plasma samples from healthy  
 295 donors were enrolled in this study. The SARS-CoV-2 antibody ELISA was performed  
 296 according to the standard ELISA method. Briefly, 30 µl plasma were added to wells  
 297 coated with recombinant SARS-CoV-2 RBD and incubated for 1 hour at 4°C. Wells  
 298 were washed three times with PBST (0.1% Tween 20 in PBS) followed by the addition  
 299 of HRP-conjugated antibody against human IgG and subsequent incubation for 1 hour

300 at room temperature. Wells were washed three times and then TMB was added.  
301 Following 20 min of incubation at room temperature, the reaction was stopped and the  
302 color reaction was read at 450 nm on an ELISA reader.

303

### 304 **scFv phage display library construction and quality assessment**

305 Total RNA was prepared from the B lymphocytes of convalescent COVID-19 patients,  
306 followed by cDNA synthesis. The genes for variable regions of heavy chain and light  
307 chain ( $V_H$  and  $V_L$ ) were amplified separately and then cloned into the phage-display  
308 vector. The recombinant vector was transformed into Escherichia coli (E. coli) TG1 by  
309 electroporation. Cells were plated on bioassay dishes containing 2-YT agar (1.6%  
310 tryptone, 1% yeast extract, 0.5% NaCl, 1.5% bacteriological agar) with 100 µg/ml  
311 ampicillin and 2% glucose. Following overnight incubation, colonies were scraped off  
312 the bioassay dishes and finally stored at  $-80^{\circ}\text{C}$  as a primary scFv library. Colony  
313 counts of a diluted subpopulation were undertaken to estimate library size. Quality  
314 assessment of the library was undertaken by RT-PCR. Amplification of a random  
315 selection of 100 clones using the oligonucleotides was undertaken to indicate if clones  
316 possessed inserts of the correct size on 1.5% DNA agarose gels. ScFv molecules  
317 displayed by rescued phages (M13KO7) were detected via the Myc tag in the  
318 scFv-pIII fusion protein using ELISA.

319

### 320 **Selection of phage scFv to SARS-CoV-2**

321 The 96-well plate were coated with RBD in PBS, blocked 2 hours with 2% BSA, and



322 incubated for 3 hours at room temperature with  $10^{12}$  phage scFv in 100  $\mu$ l PBS  
 323 containing 2% non-fat milk. After intensive washes with PBST (0.1% Tween 20 in  
 324 PBS), bound phage antibodies were eluted with 0.1M Glycine-HCl, pH 2.2, and  
 325 immediately neutralized with 1.0M Tris-Cl, pH 8.8. Eluted phage scFv were subjected  
 326 to the next round of infection, rescue, and selection. After three rounds of panning, the  
 327 higher binders to SARS-CoV-2 were selected by ELISA.

328

### 329 **ELISA to identify RBD binders**

330 96-well plates were coated with RBD in PBS, blocked 2 hours with 2% BSA, and  
 331 incubated with scFv. After three washes with PBST, the bound antibodies were  
 332 detected by HRP-conjugated anti-Myc antibody followed by incubation with TMD. The  
 333 color reaction was measured at 450 nm on an ELISA reader.

334

### 335 **Expression and purification of whole IgG antibodies**

336 In order to obtain a large amount antibody, the genes for  $V_H$  of selected scFv were  
 337 cloned into pTT5-hIgG1 vector, containing the DNA coding sequence for IgG1- $C_H$ ,  
 338 and  $V_L$  cloned into pTT5-hKappa vector separately. The recombinant plasmids were  
 339 then co-transfected into 293F cells. The antibodies in supernatant were purified by  
 340 protein G resin.

341

### 342 **Antibody binding ELISA with RBD or RBD mutants**

343 96-well plates were coated with RBD or other RBD mutants in PBS, blocked 2 hours

344 with 2% BSA, and incubated with a serial dilution of purified whole IgG antibodies.  
345 After three washes with PBST, the bound antibodies were detected by  
346 HRP-conjugated anti-human Fc antibody followed by incubation with TMD and the  
347 color reaction was measured.

348

#### 349 **Competitive inhibition ELISA assay**

350 RBD or RBD mutants was incubated 1 hour at room temperature with a serial dilution  
351 of purified whole IgG antibodies. The above mixture was subjected to 96-well plate  
352 coated with ACE2 and incubated for another 1 hour at 4°C. HRP-conjugated  
353 anti-mouse Fc was added as secondary antibody. The following procedures were the  
354 same as described in ELISA.

355

#### 356 **Competitive inhibition FACS assay**

357 293T-ACE2 cells were plated at  $1.5 \times 10^5$  cells per well in 96-well plates. The  
358 antibodies were diluted in PBS starting at a ratio of 1:4. Serial 4-fold dilutions were  
359 mixed with 0.1 µg/ml RBD equally, and incubated at 4°C for 1 hour. The mixture was  
360 added to 293T-ACE2 cells, incubated at 4°C for 1 hour, washed 3 times with PBS  
361 before APC-conjugated anti-mouse Fc antibody was added. Following 1 hour  
362 incubation at 4°C, plates were washed with PBS then developed with FACS.

363

#### 364 **BLI assays**

365 Octet systems (Octet RED96e, ForteBio) equipped with amine-reactive, streptavidin,

and anti-species sensors were purchased from ForteBio Analytics (Shanghai) Co., Ltd.

Epitope binning experiments of anti-SARS-CoV-2 Antibodies were performed in 96-channel mode with in tandem format. HIS1K Biosensors were loaded SARS-CoV-2 RBD protein, His Tag (MALS verified) (Cat. No. S1N-C52H4, ACROBiosystems). Then interact with the first antibody and the second antibody in sequence, and detect the binding signal of the second antibody to determine whether the two antibodies recognize the same epitope. The in tandem style assay comprised a five-step binding cycle; 1) a buffer baseline was established for 1 min, 2) 5 µg/ml SARS-CoV-2 RBD protein was captured about 0.4nm, 3) 7.5-15 µg/ml mAb array was loaded to saturate the immobilized antigen for 1 min, 4) 15 µg/ml of the test mAb was bound for 1min, and 5) the capture surfaces were regenerated for 30 sec. HIS1K biosensors were regenerated with 10 mM Glycine-HCl, pH1.5 for 5 sec with 3 times and neutralized for 5 sec with 3 times in neutralization buffer immediately after each regeneration. In tandem assays were conducted depending on the experiment.

380

### 381 **Preparation of RFP/SARS-CoV-2 spike pseudovirus**

Production of VSV pseudotyped with SARS-CoV-2 spike was performed using the standard lentivirus production method. Briefly, 293T cells were transfected with psPAX2 and vectors encoding SARS-CoV-2 spike protein as well as a core plasmid expressing RFP. After 48 hours post-infection, RFP/SARS-CoV-2 spike pseudoviruses were packaged and collected from the culture supernatant.

387

### 388 **Neutralization activity of mAbs against pseudovirus**

389 RFP/SARS-CoV-2 spike pseudovirus system was used as an infection model to  
390 evaluate the neutralization activity of antibodies. First, the RFP/SARS-CoV-2 spike  
391 pseudoviruses were pre-incubated with a serial dilution of purified whole IgG  
392 antibodies. Then, 293T-ACE2 cells were infected by the RFP/SARS-CoV-2 spike  
393 pseudovirus with or without antibodies. After 2 hours incubation at 37°C, the medium  
394 was refreshed with DMEM containing 10% FBS and continuously cultured for another  
395 72 hours. The infected 293T-ACE2 cells were observed under microscope and the  
396 neutralizing IC50 was calculated after FACS detection.

397

### 398 **Neutralization activity of mAbs against live SARS-CoV-2**

399 SARS-CoV-2 obtained from a sputum sample was amplified in Vero-E6 to make  
400 working stocks of the virus. To analyze the mAb neutralizing activities, two-fold serial  
401 dilutions of mAbs were added to the same volume of 100 TCID50 of SARS-CoV-2 and  
402 incubated for 1 hour at 37°C. The mixture was added to a monolayer of Vero-E6 cells  
403 in a 96-well plate and incubated at 37°C. Cytopathic effects (CPE) were observed and  
404 recorded from day 4 to day 6. For immunofluorescence (IF) analysis, Vero-E6 cells  
405 were transfected and fixed on day 6 post-transfection in 80% acetone for 10 min at  
406 room temperature. Cells were immunolabelled for 1.5 hours at room temperature with  
407 the rabbit anti SARS-CoV-2 spike antibody, washed three times with PBS, and  
408 followed by the addition of Alexa Fluor 488-conjugated goat anti-rabbit IgG antibody.  
409 Wells were washed three times and then DAPI was added. Following 30 minutes of

410 incubation at room temperature, the reaction was reading in fluorescent microscopy.

411

## 412 **Acknowledgements**

413 This work was supported by National Key R&D Program of China [2019YFA0802800,  
414 2018YFA0507001]; Zhejiang University special scientific research fund for COVID-19  
415 prevention and control (2020XGZX086); Zhejiang Provincial Science and technology  
416 department key R&D plan emergency project [2020c03123-8]; Innovation Program of  
417 Shanghai Municipal Education Commission [2017-01-07-00-05-E00011];  
418 Fundamental Research Funds for the Central Universities

419

420

## 421 **Conflict of Interests**

422 We declare that we have no conflict of interests.

423

## 424 Reference

- 425 1. Wu A, Peng Y, Huang B, Ding X, Wang X, Niu P *et al.* Genome Composition and  
426 Divergence of the Novel Coronavirus (2019-nCoV) Originating in China. *Cell Host*  
427 *Microbe* 2020; **27**(3): 325-328.
- 428 2. Zhou P, Yang XL, Wang XG, Hu B, Zhang L, Zhang W *et al.* A pneumonia outbreak  
429 associated with a new coronavirus of probable bat origin. *Nature* 2020; **579**(7798):  
430 270-273.
- 431 3. Chinazzi M, Davis JT, Ajelli M, Gioannini C, Litvinova M, Merler S *et al.* The effect of  
432 travel restrictions on the spread of the 2019 novel coronavirus (COVID-19) outbreak.  
433 *Science* 2020; **368**(6489): 395-400.
- 434 4. Xu Z, Shi L, Wang Y, Zhang J, Huang L, Zhang C *et al.* Pathological findings of  
435 COVID-19 associated with acute respiratory distress syndrome. *Lancet Respir Med*  
436 2020; **8**(4): 420-422.
- 437 5. Chan JF, Yuan S, Kok KH, To KK, Chu H, Yang J *et al.* A familial cluster of pneumonia  
438 associated with the 2019 novel coronavirus indicating person-to-person transmission:  
439 a study of a family cluster. *Lancet* 2020; **395**(10223): 514-523.
- 440 6. Hoffmann M, Kleine-Weber H, Schroeder S, Kruger N, Herrler T, Erichsen S *et al.*  
441 SARS-CoV-2 Cell Entry Depends on ACE2 and TMPRSS2 and Is Blocked by a  
442 Clinically Proven Protease Inhibitor. *Cell* 2020; **181**(2): 271-280 e278.
- 443 7. Walls AC, Park YJ, Tortorici MA, Wall A, McGuire AT, Veasler D. Structure, Function,  
444 and Antigenicity of the SARS-CoV-2 Spike Glycoprotein. *Cell* 2020; **181**(2): 281-292  
445 e286.

- 446 8. Ou J, Zhou Z, Dai R, Zhang J, Lan W, Zhao S *et al.* Emergence of RBD mutations in  
447 circulating SARS-CoV-2 strains enhancing the structural stability and human ACE2  
448 receptor affinity of the spike protein. *bioRxiv*2020: 2020.2003.2015.991844.
- 449 9. Ju B, Zhang Q, Ge X, Wang R, Yu J, Shan S *et al.* Potent human neutralizing  
450 antibodies elicited by SARS-CoV-2 infection. *bioRxiv*2020: 2020.2003.2021.990770.
- 451 10. Cheng Y, Wong R, Soo YO, Wong WS, Lee CK, Ng MH *et al.* Use of convalescent  
452 plasma therapy in SARS patients in Hong Kong. *Eur J Clin Microbiol Infect Dis* 2005;  
453 **24**(1): 44-46.
- 454 11. Ni L, Ye F, Cheng M-L, Feng Y, Deng Y-Q, Zhao H *et al.* Detection of  
455 SARS-CoV-2-specific humoral and cellular immunity in COVID-19 convalescent  
456 individuals. *Immunity*.
- 457 12. Zelenetz AD. A clinical and scientific overview of tositumomab and iodine I 131  
458 tositumomab. *Semin Oncol*2003; **30**(2 Suppl 4): 22-30.
- 459 13. Marks JD, Hoogenboom HR, Bonnert TP, McCafferty J, Griffiths AD, Winter G.  
460 By-passing immunization. Human antibodies from V-gene libraries displayed on  
461 phage. *J Mol Biol* 1991; **222**(3): 581-597.
- 462 14. Sui J, Li W, Murakami A, Tamin A, Matthews LJ, Wong SK *et al.* Potent neutralization  
463 of severe acute respiratory syndrome (SARS) coronavirus by a human mAb to S1  
464 protein that blocks receptor association. *Proc Natl Acad Sci U S A* 2004; **101**(8):  
465 2536-2541.
- 466 15. Sun D, Shi H, Chen J, Shi D, Zhu Q, Zhang H *et al.* Generation of a mouse scFv  
467 library specific for porcine aminopeptidase N using the T7 phage display system. *J*



468 *Viol Methods* 2012; **182**(1-2): 99-103.

469 16. Zhao A, Tohidkia MR, Siegel DL, Coukos G, Omid Y. Phage antibody display libraries:  
470 a powerful antibody discovery platform for immunotherapy. *Crit Rev Biotechnol* 2016;  
471 **36**(2): 276-289.

472 17. Frenzel A, Kugler J, Helmsing S, Meier D, Schirmann T, Hust M *et al.* Designing  
473 Human Antibodies by Phage Display. *Transfus Med Hemother* 2017; **44**(5): 312-318.

474 18. Gui M, Song W, Zhou H, Xu J, Chen S, Xiang Y *et al.* Cryo-electron microscopy  
475 structures of the SARS-CoV spike glycoprotein reveal a prerequisite conformational  
476 state for receptor binding. *Cell Res* 2017; **27**(1): 119-129.

477 19. Yuan Y, Cao D, Zhang Y, Ma J, Qi J, Wang Q *et al.* Cryo-EM structures of MERS-CoV  
478 and SARS-CoV spike glycoproteins reveal the dynamic receptor binding domains. *Nat*  
479 *Commun* 2017; **8**: 15092.

480 20. Lan J, Ge J, Yu J, Shan S, Zhou H, Fan S *et al.* Structure of the SARS-CoV-2 spike  
481 receptor-binding domain bound to the ACE2 receptor. *Nature* 2020.

482 21. Tian X, Li C, Huang A, Xia S, Lu S, Shi Z *et al.* Potent binding of 2019 novel  
483 coronavirus spike protein by a SARS coronavirus-specific human monoclonal  
484 antibody. *Emerg Microbes Infect* 2020; **9**(1): 382-385.

485 22. van den Brink EN, Ter Meulen J, Cox F, Jongeneelen MA, Thijsse A, Throsby M *et al.*  
486 Molecular and biological characterization of human monoclonal antibodies binding to  
487 the spike and nucleocapsid proteins of severe acute respiratory syndrome coronavirus.  
488 *J Virol* 2005; **79**(3): 1635-1644.

489

## 490 **Figure Legends**

491 **Figure 1. Construction of Patient-derived scFv library.** (A) The flow chart of  
492 construction and panning of patient-derived scFv libraries. (B) The binding affinity of  
493 plasma from each patient to RBD by ELISA. (P1-18, Patients with COVID-19  
494 recovered. HD87-90, healthy donors). (C) The capacity of each library from 17  
495 different COVID-19 recovered patients (7# failed). (D) The clone quality assessment  
496 of each scFv library. (E) The scFv display rate of each library.

497

498 **Figure 2. Screening for specific scFv to RBD.** (A) The binding affinity of each clone  
499 picked after 3 rounds of enrichment. (B) The 19 antibodies were divided into 6 bins by  
500 epitope binning assay.

501

502 **Figure 3. Binding and blocking assays for different scFv.** (A, B) Binding of  
503 antibodies from Bin1 and Bin2 to RBD protein of SARS-CoV-2 is detected by ELISA.  
504 (C, D) Blocking the binding of RBD to ACE2 by antibodies from two groups are  
505 detected by FACS. Abs were diluted as indicated in the figure. (E) The binding affinity  
506 of 4 positive antibodies from Bin2. (F) The blocking ability of 4 positive antibodies from  
507 Bin2.

508

509 **Figure 4. Cross-neutralization against SARS-CoV-2 RBD mutations by different**  
510 **antibodies.** (A) The binding affinity of 4 positive antibodies from Bin2 to different  
511 SARS-CoV-2 RBD mutations. (B) The blocking ability of 4 positive antibodies from

512 Bin2 to different SARS-CoV-2 RBD mutations.

513

514 **Figure 5. Antiviral properties of human IgG antibodies.** (A) The inhibition of 4  
 515 positive antibodies from Bin2 to the binding of RBD to hACE2-293T cells. (B)  
 516 Anti-RBD antibodies (HTS0422, HTS0433, HTS0446, HTS0483) neutralizes viruses  
 517 pseudotyped with S glycoproteins from the SARS-COV-2 virus. (C) HIVs pseudotyped  
 518 with the S glycoprotein were incubated with Abs diluted as indicated in the figure for 1  
 519 h before infection. Fluorescence intensity in target cells were measured, and the  
 520 percent neutralization was calculated. Bars indicate SE. (D) The authentic infection of  
 521 SARS-CoV-2 to Vero-E6 cells was neutralized by Anti-RBD antibodies. (E) The IC<sub>50</sub> of  
 522 each antibody from Bin2 was calculated by CPE assay.

**A**

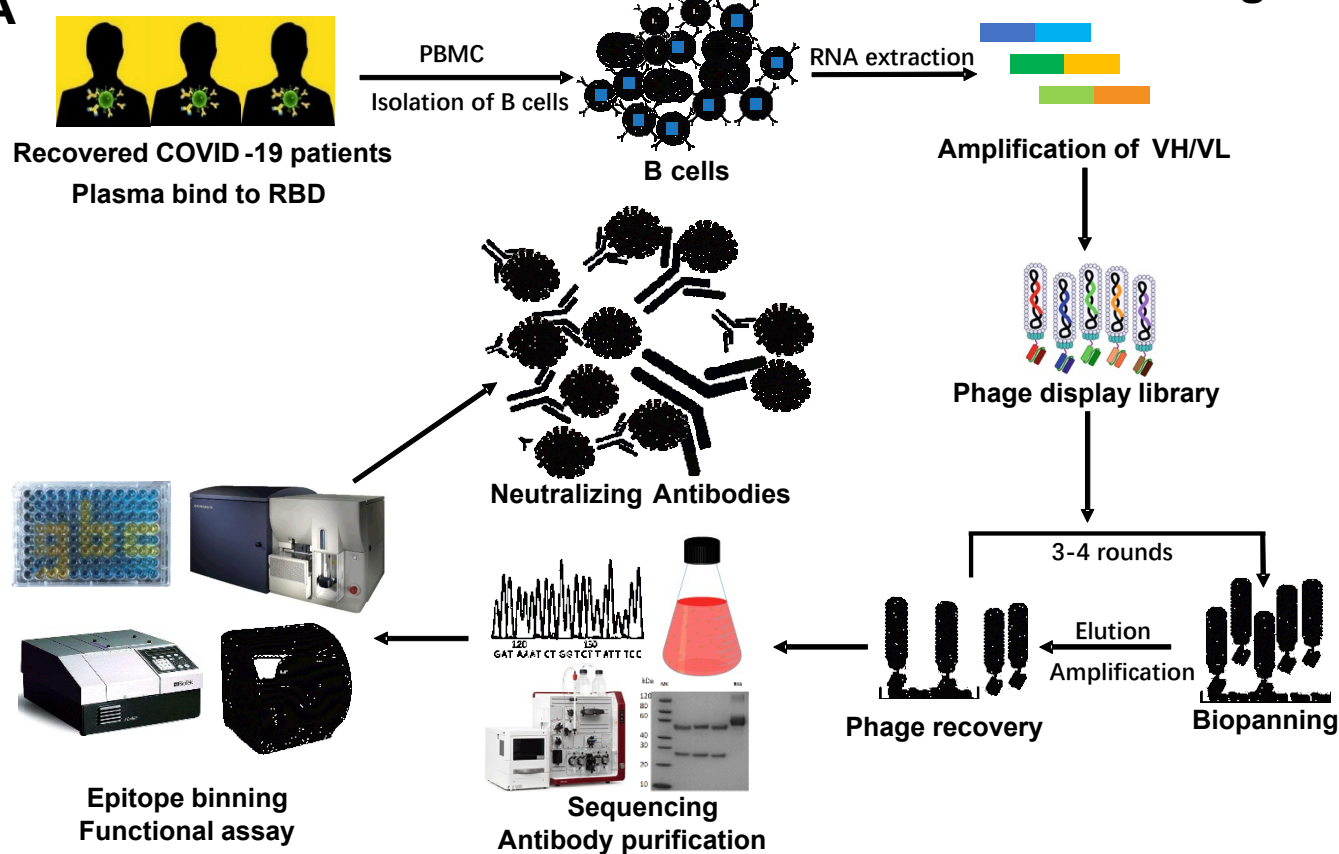

**B**

### Plasma Binding to SARS-CoV-2 RBD

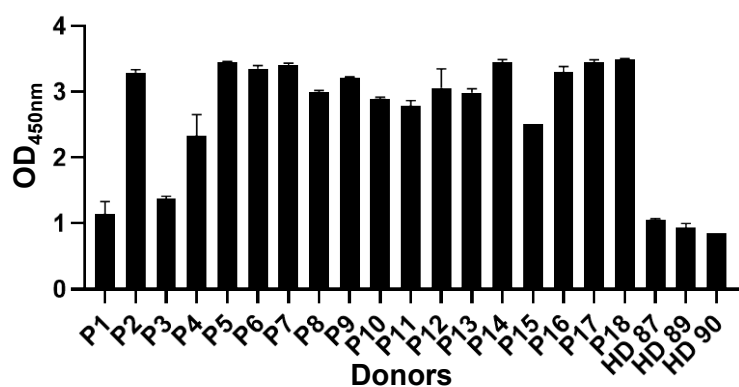

**C**

### Capacity of each library

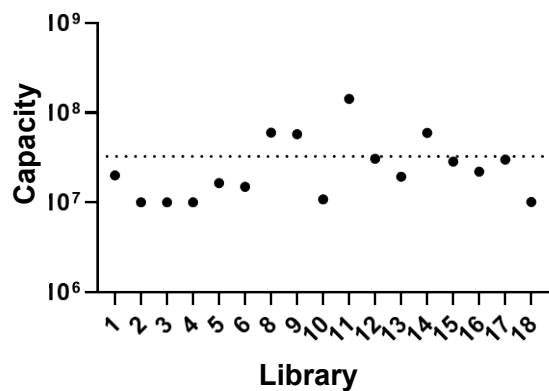

**D**

### Positive rate of each library

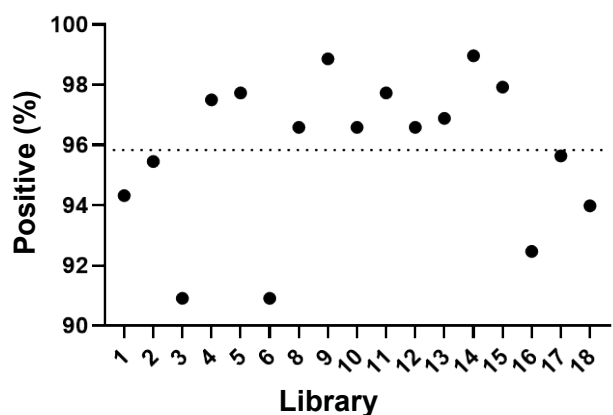

**E**

### scFv frequency of each library

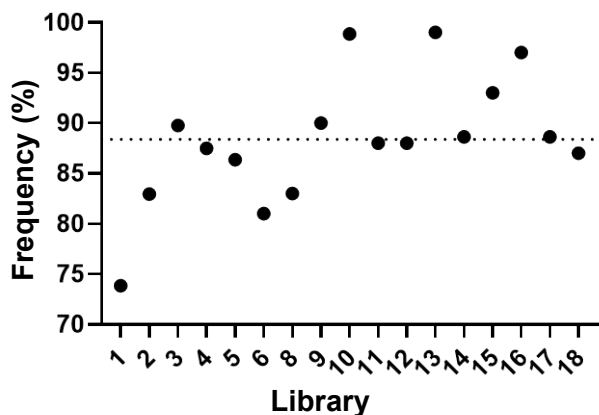

A

### Phage binding to SARS-CoV-2 RBD

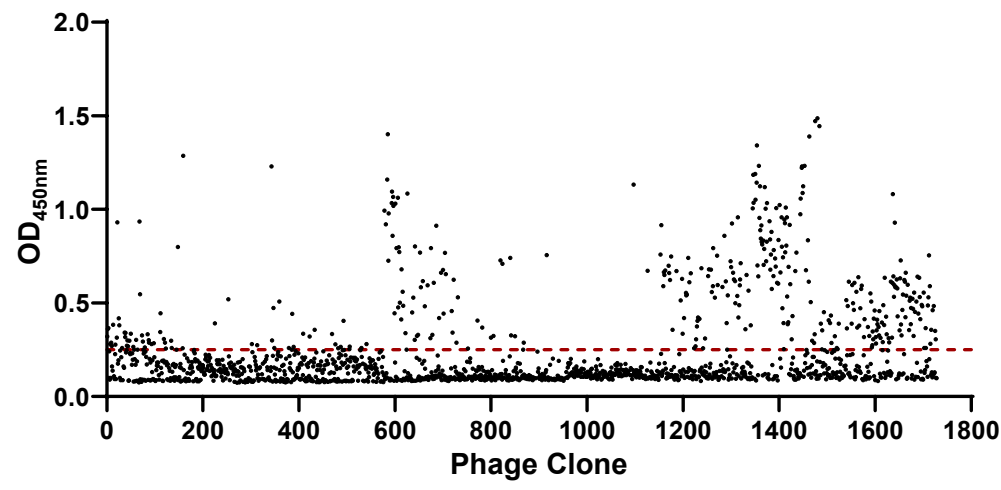

B

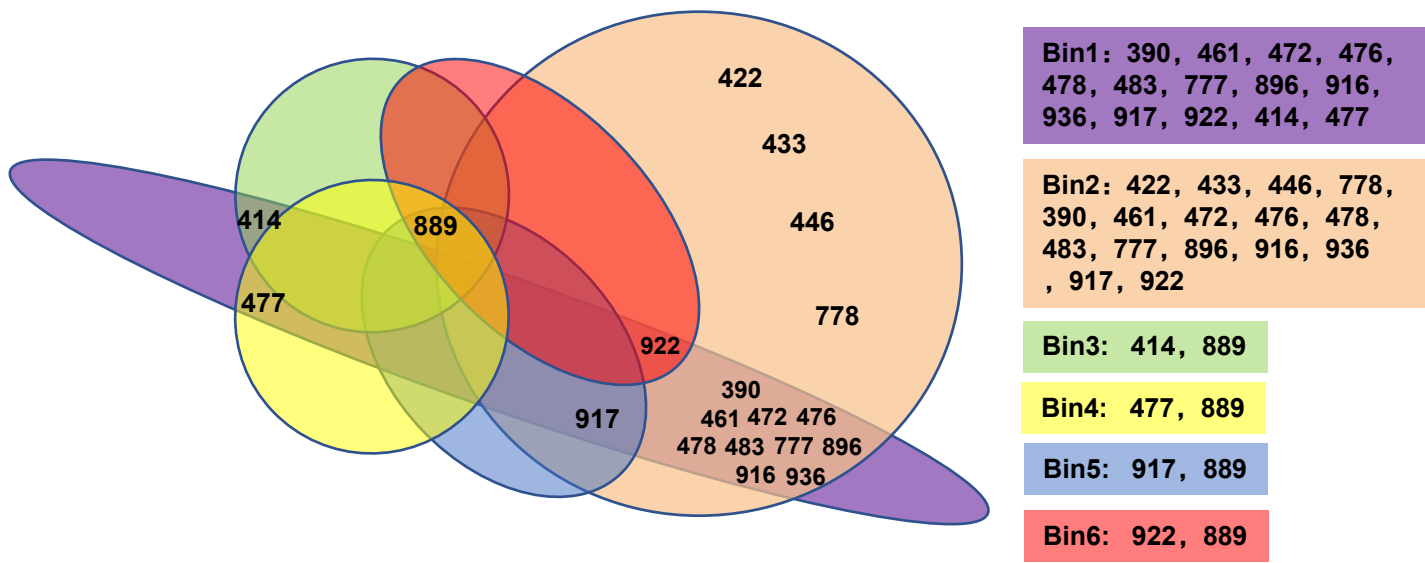

A

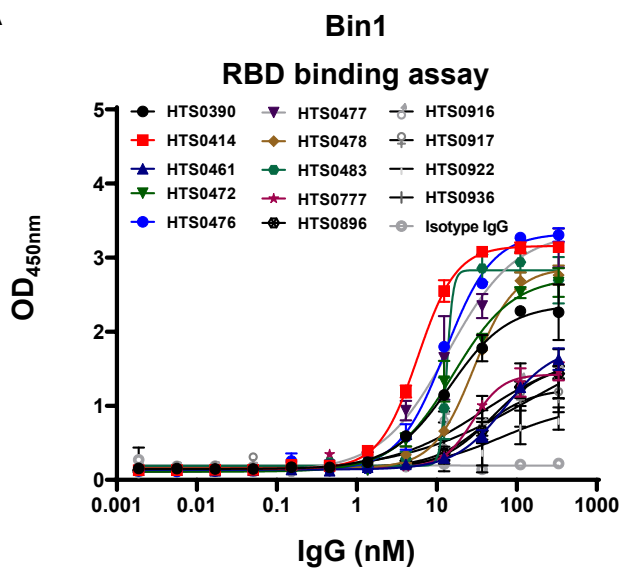

B

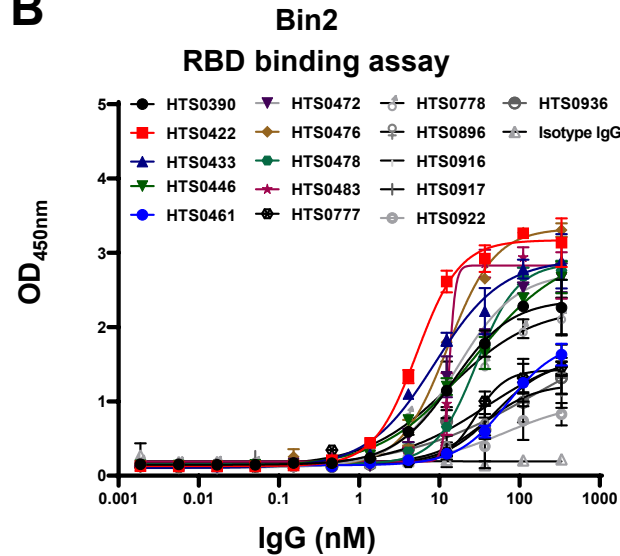

C

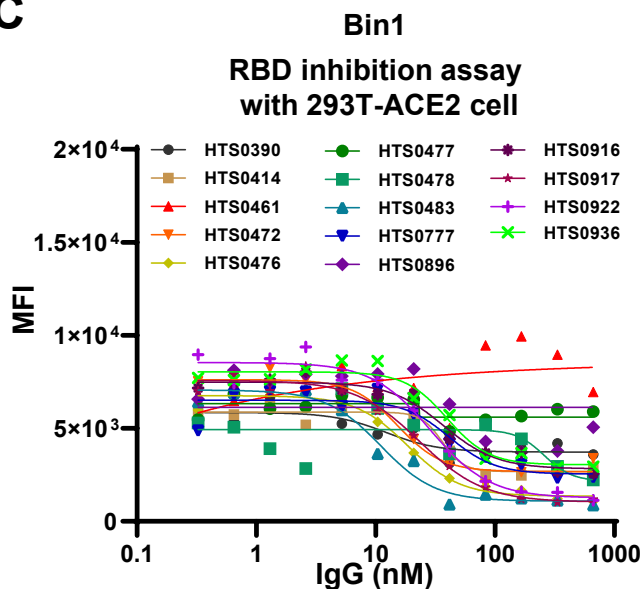

D

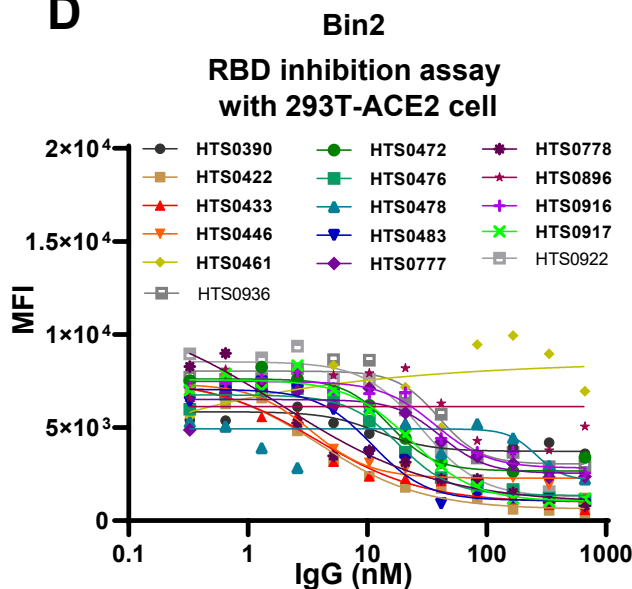

E

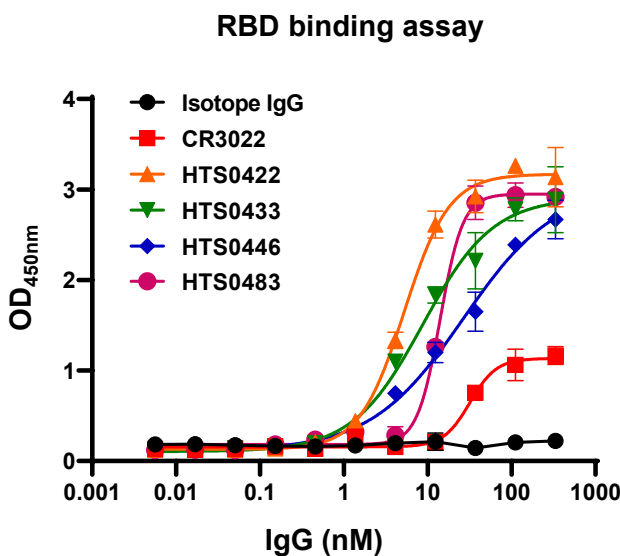

F

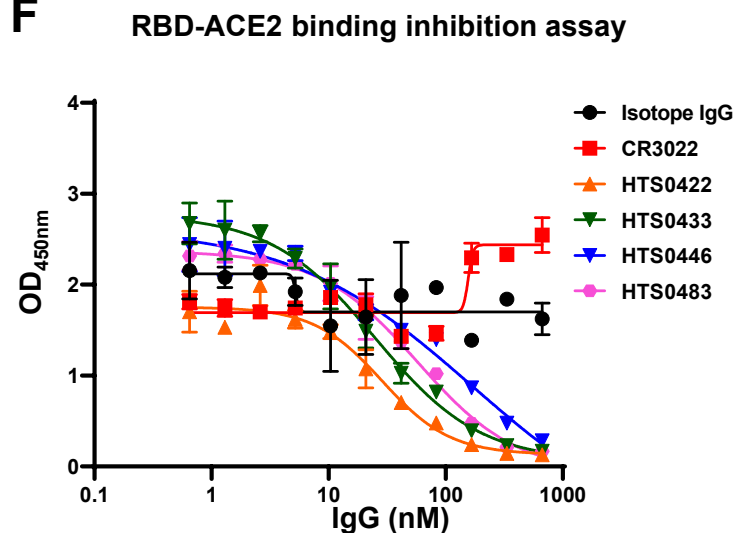

**A**

**RBD (WT) binding assay**

**RBD (W436R) binding assay**

**RBD (R408I) binding assay**

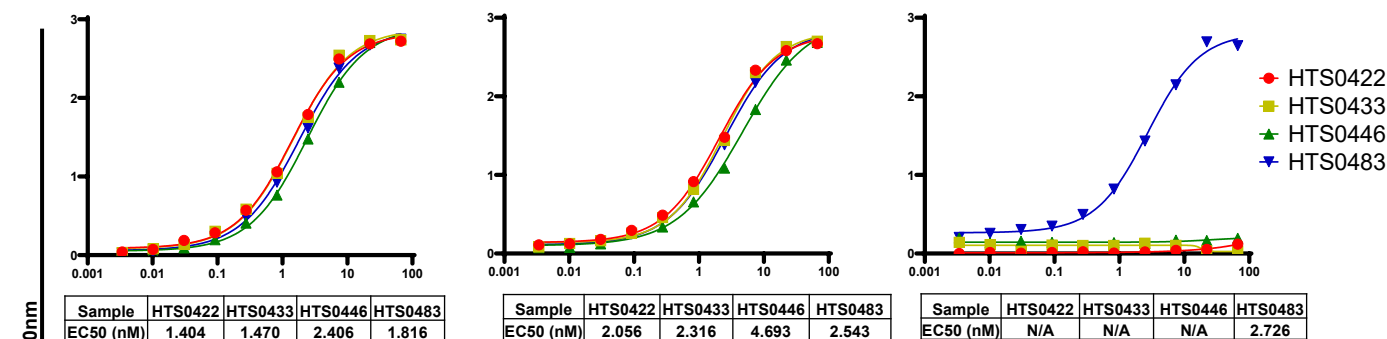

**RBD (N354D) binding assay**

**RBD (V367F) binding assay**

**RBD (N354D, D364Y) binding assay**

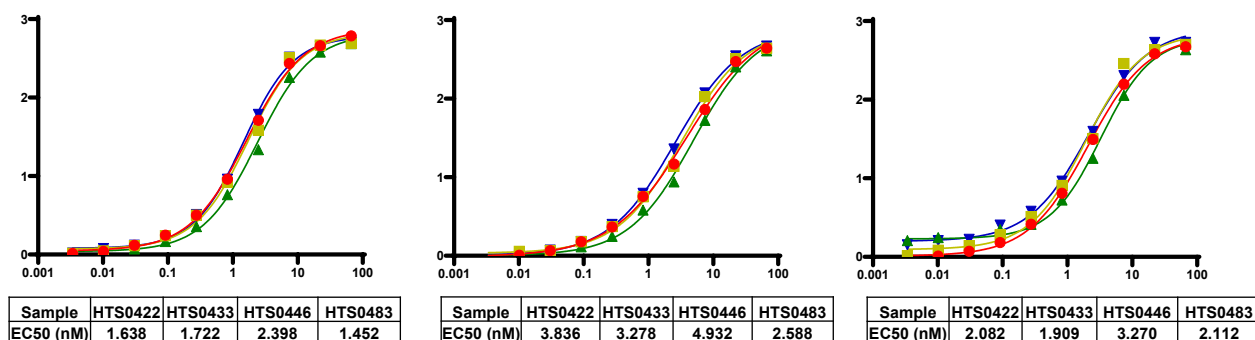

IgG (nM)

**B**

**RBD (WT)-ACE2 binding inhibition assay**

**RBD (W436R)-ACE2 binding inhibition assay**

**RBD (R408I)-ACE2 binding inhibition assay**

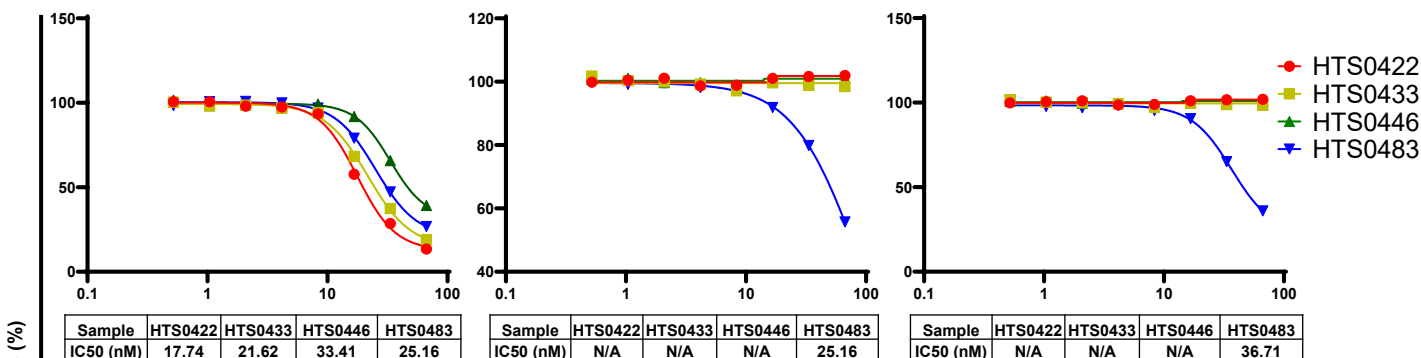

**RBD (N354D)-ACE2 binding inhibition assay**

**RBD (V367F)-ACE2 binding inhibition assay**

**RBD (N354D, D364Y)-ACE2 binding inhibition assay**

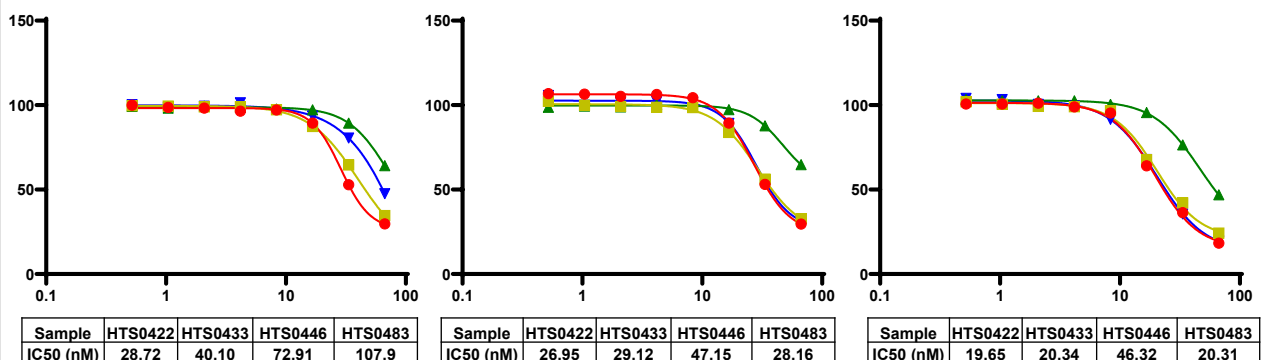

IgG (nM)



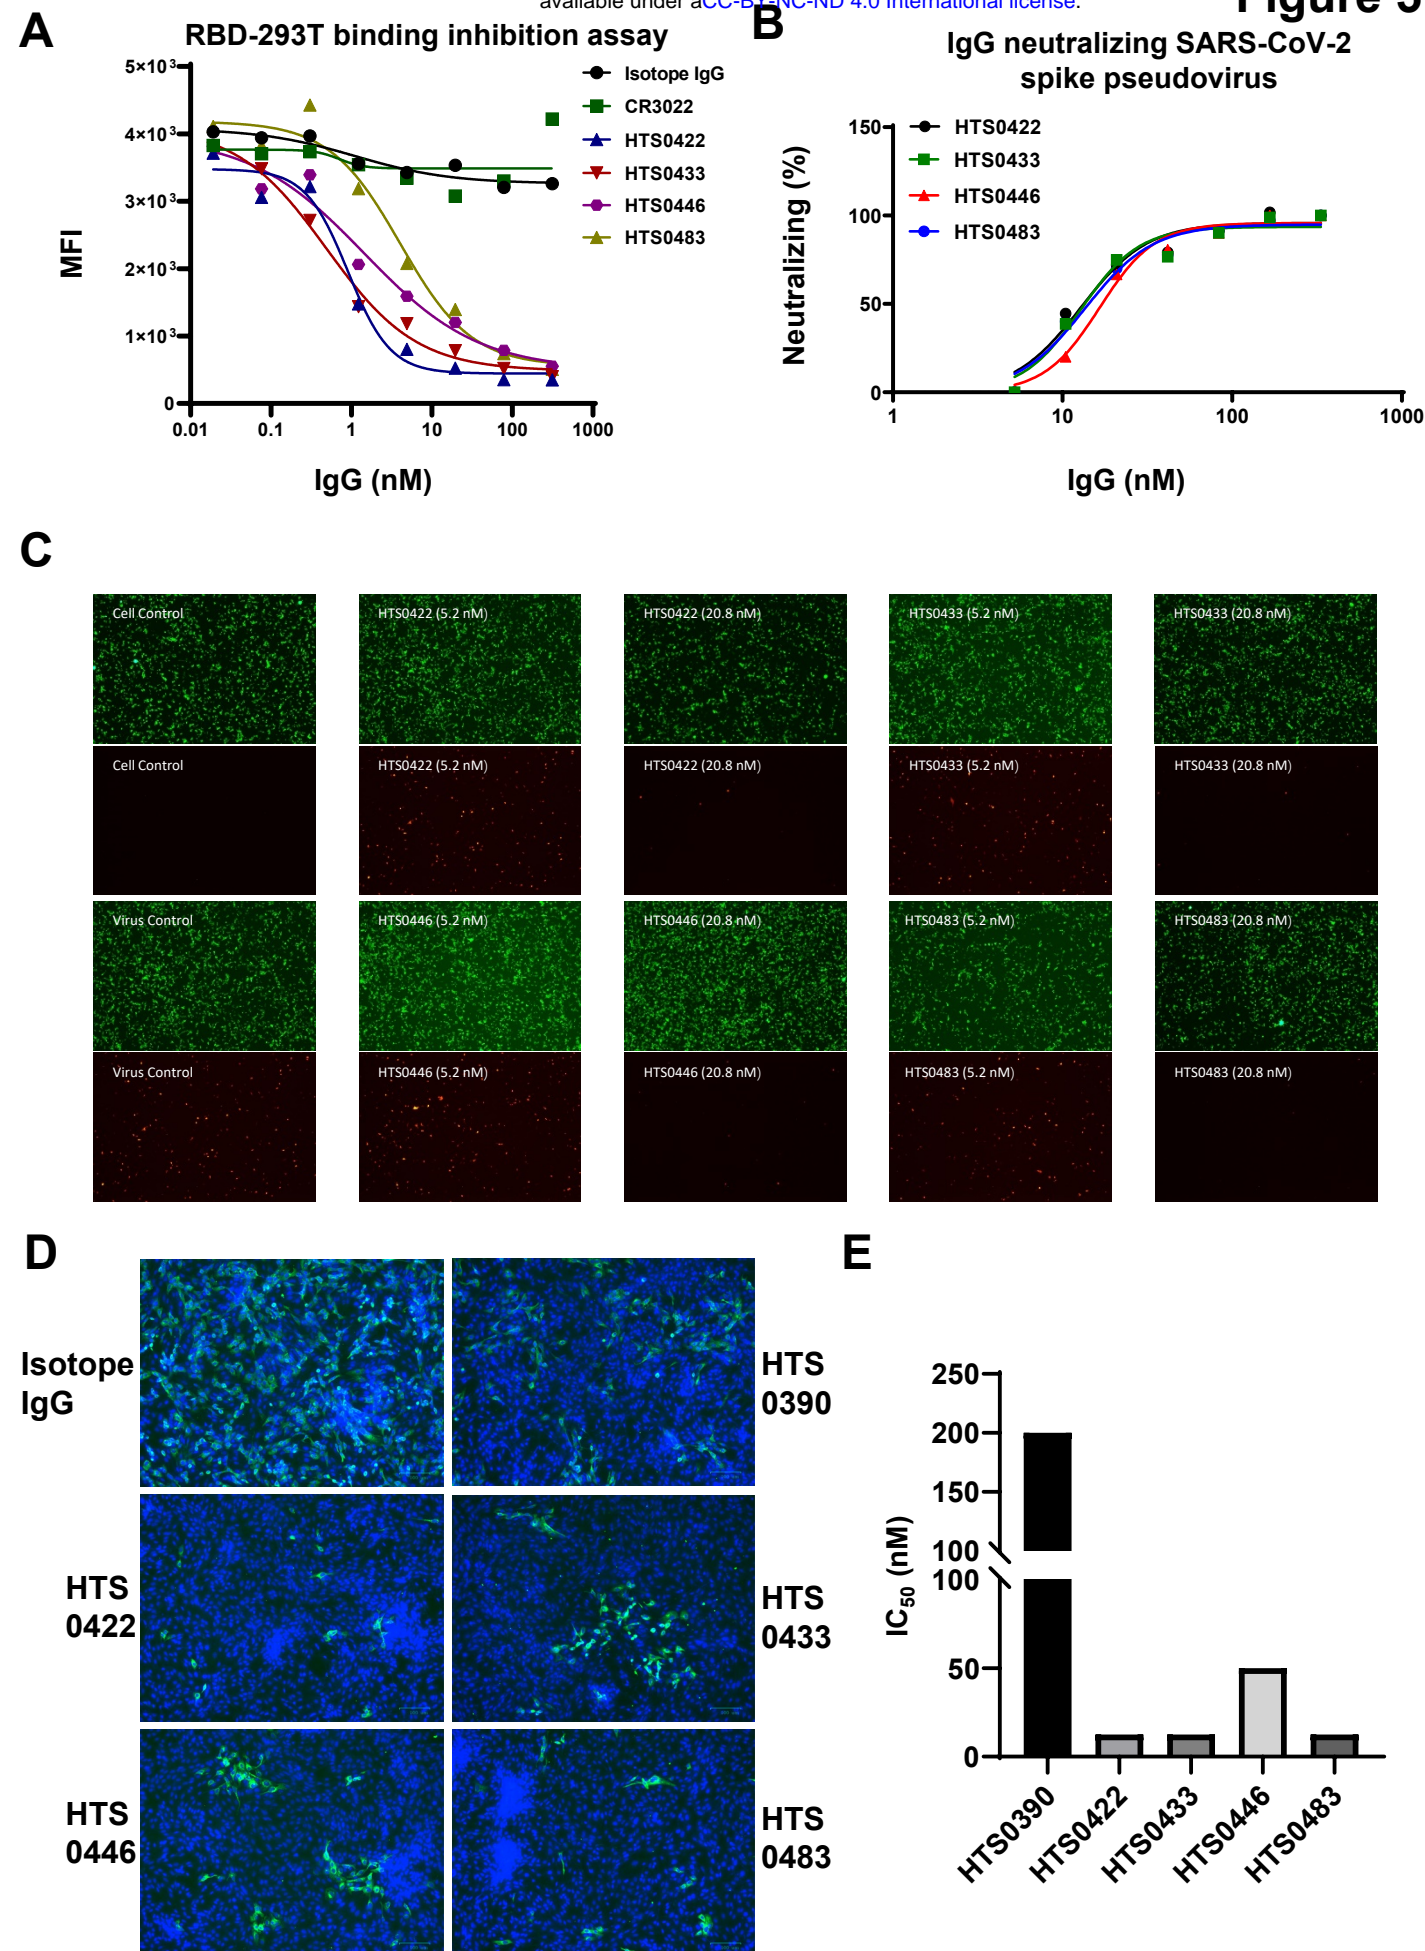

Source: https://www.biorxiv.org/content/biorxiv/early/2020/06/06/2020.06.06.137513.full.pdf
